# Supplementary material for: Influences of heterogeneous native contact energy and many-body interactions on the prediction of protein folding mechanisms
Source: Royal Society of Chemistry journal article supplement (doi:10.1039/c6cp06181h), 2016-01-01
Supplement: c6cp06181h1.pdf [file c6cp06181h1.pdf]

### Supporting Figures and Tables

**Figure S1.** Brønsted plots from four model proteins 2CI2, 1R69, 1SHF and 1RIS using G $\ddot{o}$  model with scale 0.25, 0.50, 0.90 for residue mutation. The correlation coefficient  $r$  is 0.84, 0.83 and 0.81, and corresponding fitting slope  $s$  is 0.55, 0.54 and 0.52 respectively.

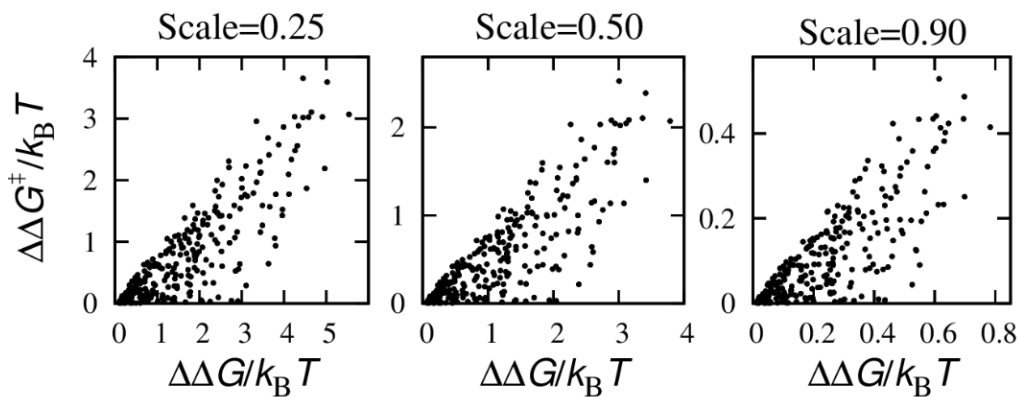

**Figure S2.** Folding free energy profiles as function of native contact fraction by different models for nine studied proteins. The number within the parentheses after “mb” denotes the value of many-body parameter  $\varepsilon_{mb}$  in corresponding mb-MJ model.

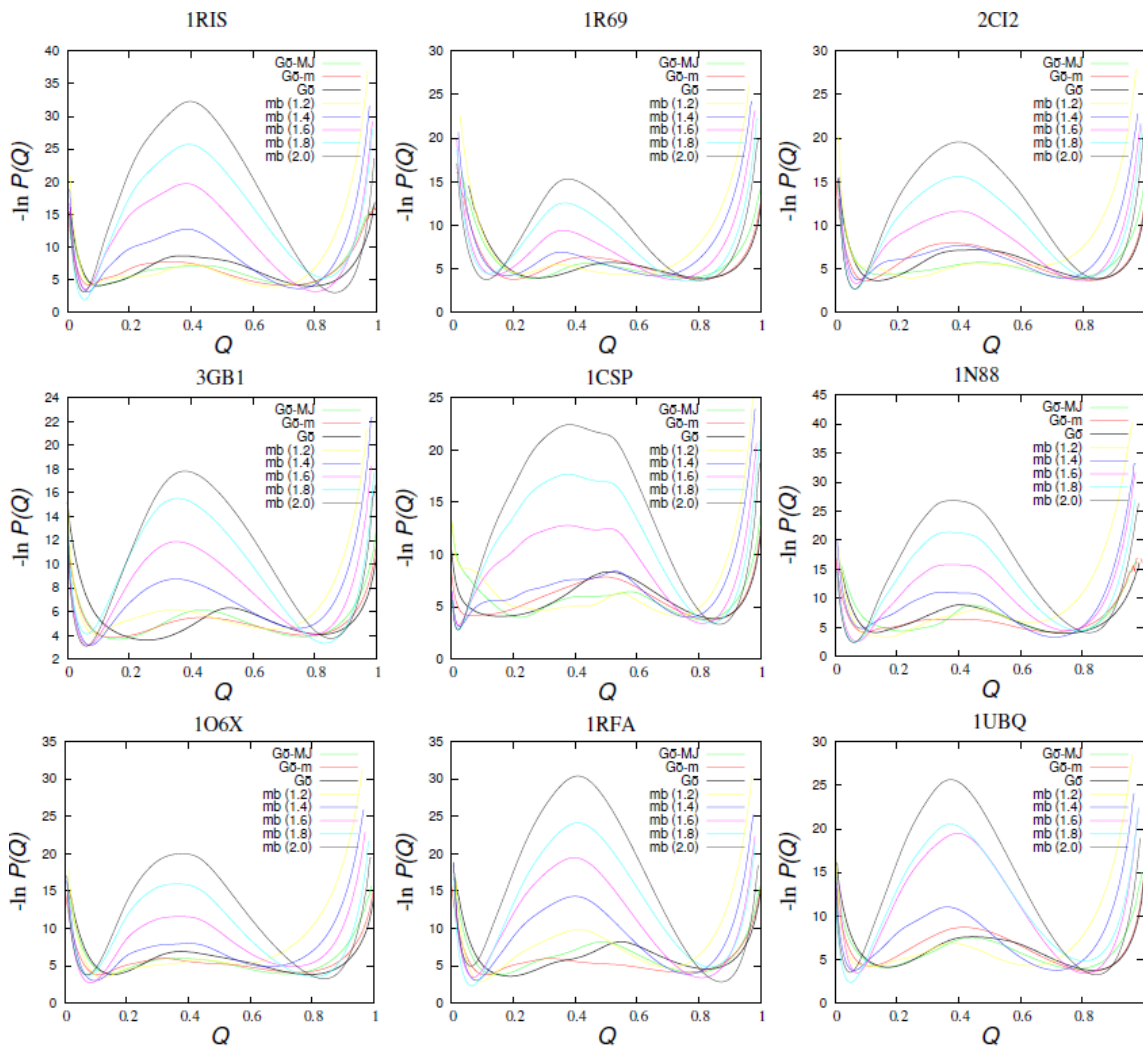

**Figure S3.** The residue  $\phi$ -values for proteins 2CI2, 1CSP, 1UBQ and 1RIS predicted by G $\ddot{o}$ , G $\ddot{o}$ -MJ, mb-MJ ( $\epsilon_{\text{mb}}$  1.6) models and those from experiments<sup>1-4</sup>.

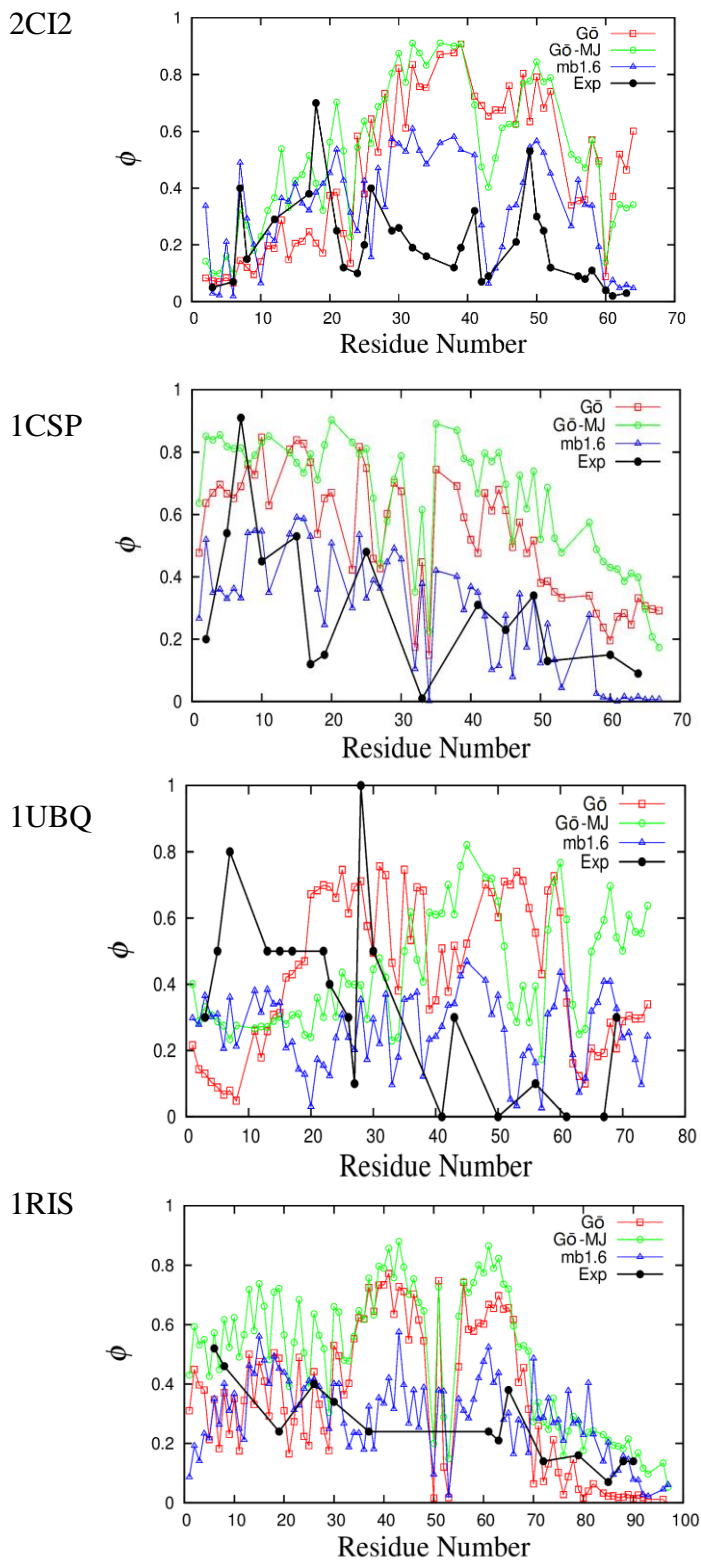

**Table S1.** Proteins studied in this work.

| Protein PDB ID | Residue Number | Structure class |
|----------------|----------------|-----------------|
| 2CI2           | 20-83          | $\alpha/\beta$  |
| 1SHF           | 84-142         | $\beta$         |
| 1R69           | 1-63           | $\alpha$        |
| 1RIS           | 1-97           | $\alpha/\beta$  |
| 1UBQ           | 1-76           | $\alpha/\beta$  |
| 1N88           | 1-96           | $\alpha/\beta$  |
| 1CSP           | 1-67           | $\beta$         |
| 3GB1           | 1-56           | $\alpha/\beta$  |
| 1O6X           | 1-81           | $\alpha/\beta$  |
| 1RFA           | 55-132         | $\alpha/\beta$  |
| 1APS           | 1-98           | $\alpha/\beta$  |
| 1FKB           | 1-107          | $\alpha/\beta$  |
| 1DIVC          | 58-149         | $\alpha/\beta$  |
| 1DIVN          | 1-57           | $\alpha/\beta$  |
| 1SHG           | 6-62           | $\beta$         |
| 1COA           | 20-83          | $\alpha/\beta$  |
| 1FMK           | 82-140         | $\beta$         |
| 1HZ6           | 2-64           | $\alpha/\beta$  |
| 2ABD           | 1-86           | $\alpha$        |
| 1PGB           | 1-56           | $\alpha/\beta$  |
| 1SSO           | 1-62           | $\beta$         |
| 1IMQ           | 1-86           | $\alpha$        |
| 1YYJ           | 1-106          | $\alpha$        |
| 1ST7           | 1-86           | $\alpha$        |
| 1E0L           | 1-37           | $\beta$         |
| 1W4E           | 126-170        | $\alpha$        |
| 1SS1           | 1-60           | $\alpha$        |
| 1W4J           | 125-175        | $\alpha$        |

**Table S2.** Topology dependence of average  $\phi$ -value (fitting slope of Brønsted plot) by all the models used in this study.

| Model<br>Topology | Gō   | Gō-m | Gō-MJ | mb-MJ ( $\epsilon_{mb}$ ) |      |      |      |      |
|-------------------|------|------|-------|---------------------------|------|------|------|------|
|                   |      |      |       | 1.2                       | 1.4  | 1.6  | 1.8  | 2.0  |
| $\alpha$          | 0.42 | 0.44 | 0.40  | 0.41                      | 0.37 | 0.35 | 0.30 | 0.25 |
| $\beta$           | 0.54 | 0.58 | 0.58  | 0.41                      | 0.53 | 0.35 | 0.31 | 0.26 |
| $\alpha/\beta$    | 0.50 | 0.57 | 0.57  | 0.59                      | 0.46 | 0.38 | 0.30 | 0.27 |

### References

1. L.S. Itzhaki, D.E. Otzen and A.R. Fersht. *J. Mol. Biol.*, 1995, **254**, 260-288.
2. M.M. Garcia-Mira, D. Boehringer and F.X. Schmid. *J. Mol. Biol.*, 2004, **339**, 555-569.
3. H.M. Went and S.E. Jackson. *Protein. Eng. Des. Sel.*, 2005, **18**, 229-237.
4. M.O. Lindberg, E. Haglund, I.A. Hubner, E.I. Shakhnovich and M. Oliveberg. *Proc. Natl. Acad. Sci. USA.*, 2006, **103**, 4083-4088.
